# Supplementary material for: High prevalence of musculoskeletal pain in individuals with severe obesity: sites, intensity, and associated factors
Source: PubMed Central journal article supplement — Korean J Pain. 2020 Jul 1;33(3):245–57. doi: 10.3344/kjp.2020.33.3.245 (PMC7336341; doi:10.3344/kjp.2020.33.3.245), 2020-07-01
Supplement: KJP-33-245_Supple.pdf [file KJP-33-245_Supple.pdf]

**Supplementary Table 1.** Bivariate Analysis of the Association between Pain in Upper Body Regions and Independent Variables in Severely Obese Individuals (N = 150)

| Independent variable                               | Neck             |         | Shoulder          |         | Elbow              |         | Wrist/hands       |         | Upper back       |         |
|----------------------------------------------------|------------------|---------|-------------------|---------|--------------------|---------|-------------------|---------|------------------|---------|
|                                                    | PR (95% CI)      | P value | PR (95% CI)       | P value | PR (95% CI)        | P value | PR (95% CI)       | P value | PR (95% CI)      | P value |
| Sex                                                |                  | 0.767   |                   | 0.255   |                    | -       |                   | 0.102   |                  | 0.085   |
| M                                                  | 1                |         | 1                 |         | -                  |         | 1                 |         | 1                |         |
| F                                                  | 1.32 (0.43-4.03) |         | 1.89 (0.63-5.65)  |         | -                  |         | 3.09 (0.80-11.99) |         | 2.23 (0.89-5.57) |         |
| Age (yr)                                           |                  | 0.128   |                   | 0.113   |                    | 0.336   |                   | 0.390   |                  | 0.829   |
| ≤ 39                                               | 1                |         | 1                 |         | 1                  |         | 1                 |         | 1                |         |
| ≥ 40                                               | 1.74 (0.85-3.53) |         | 1.59 (0.90-2.83)  |         | 1.91 (0.56-6.52)   |         | 1.27 (0.73-2.21)  |         | 0.95 (0.62-1.45) |         |
| Skin color                                         |                  | 0.398   |                   | 0.2151  |                    | 0.496   |                   | 0.5814  |                  | 0.151   |
| White                                              | 1.41 (0.69-2.88) |         | 1.44 (0.81-2.56)  |         | 1.51 (0.44-5.11)   |         | 1.18 (0.66-2.09)  |         | 1.36 (0.89-2.06) |         |
| Brown and black                                    | 1                |         | 1                 |         | 1                  |         | 1                 |         | 1                |         |
| Living with partner                                |                  | 0.499   |                   | 0.392   |                    | 0.747   |                   | 0.459   |                  | 0.596   |
| No                                                 | 1                |         | 1                 |         | 1                  |         | 1                 |         | 1                |         |
| Yes                                                | 1.30 (0.60-2.80) |         | 1.32 (0.70-2.47)  |         | 1.35 (0.36-5.03)   |         | 1.25 (0.69-2.28)  |         | 1.13 (0.72-1.76) |         |
| Years of schooling                                 |                  | 0.668   |                   | > 0.99  |                    | 0.745   |                   | 0.265   |                  | 0.183   |
| ≤ 10                                               | 1.17 (0.58-2.36) |         | 1 (0.56- 1.77)    |         | 0.67 (0.20-2.28)   |         | 1.37 (0.78- 2.41) |         | 1.33 (0.87-2.04) |         |
| ≥ 11                                               | 1                |         | 1                 |         | 1                  |         | 1                 |         | 1                |         |
| Economic class                                     |                  | 0.585   |                   | 0.091   |                    | -       |                   | 0.263   |                  | 0.127   |
| A-B                                                | 1                |         | 1                 |         | -                  |         | 1                 |         | 1                |         |
| C                                                  | 1.11 (0.43-2.82) |         | 2.13 (0.79-5.72)  |         | -                  |         | 1.85 (0.77-4.45)  |         | 1.66 (0.86-3.22) |         |
| D-E                                                | 1.70 (0.58-4.95) |         | 3.19 (1.11-9.19)  |         | -                  |         | 2.27 (0.84-6.11)  |         | 2.12 (1.03-4.40) |         |
| Occupation                                         |                  | 0.897   |                   | 0.836   |                    | 0.512   |                   | 0.717   |                  | 0.924   |
| Formal worker                                      | 1.17 (0.49-2.80) |         | 1.23 (0.61-2.49)  |         | 1.73 (0.44-6.91)   |         | 0.88 (0.43-1.78)  |         | 0.99 (0.59-1.65) |         |
| Informal worker/<br>freelance                      | 1                |         | 1                 |         | 1                  |         | 1                 |         | 1                |         |
| Retired/domestic<br>worker and others <sup>a</sup> | 1.22 (0.51-2.91) |         | 1.18 (0.57-2.43)  |         | 0.72 (0.12-4.16)   |         | 1.17 (0.61- 2.23) |         | 1.08 (0.66-1.79) |         |
| Smoking status                                     |                  | 0.488   |                   | 0.759   |                    | 0.296   |                   | 0.523   |                  | 0.323   |
| No                                                 | 1                |         | 1                 |         | 1                  |         | 1                 |         | 1                |         |
| Yes, former or<br>current smoker                   | 1.29 (0.63-2.63) |         | 0.91 (0.48-1.69)  |         | 2.06 (0.62-6.81)   |         | 1.20 (0.68-2.12)  |         | 1.24 (0.81-1.88) |         |
| Binge drinking                                     |                  | 0.261   |                   | 0.893   |                    | 0.473   |                   | 0.964   |                  | 0.460   |
| No                                                 | 1                |         | 1                 |         | 1                  |         | 1                 |         | 1                |         |
| Yes                                                | 0.59 (0.24-1.47) |         | 0.96 (0.50-1.81)  |         | 1.66 (0.49-5.61)   |         | 1.01 (0.55-1.86)  |         | 1.18 (0.76-1.82) |         |
| Sedentary time<br>(min/day)                        |                  | 0.004*  |                   | 0.029*  |                    | 0.745   |                   | 0.072   |                  | 0.429   |
| Lower                                              | 3.94 (1.56-9.96) |         | 1.97 (0.43-5.04)  |         | 1.48 (0.42-5.24)   |         | 1.69 (0.95-2.99)  |         | 1.18 (0.78-1.79) |         |
| Higher                                             | 1                |         | 1                 |         | 1                  |         | 1                 |         | 1                |         |
| Daily fruits intake                                |                  | 0.081   |                   | 0.797   |                    | 0.727   |                   | 0.955   |                  | 0.285   |
| No                                                 | 2.79 (0.88-8.81) |         | 1.09 (0.56-2.12)  |         | 1.18 (0.23-3.14)   |         | 1.02 (0.54-1.90)  |         | 1.33 (0.79-2.26) |         |
| Yes                                                | 1                |         | 1                 |         | 1                  |         | 1                 |         | 1                |         |
| Daily vegetables<br>intake                         |                  | 0.664   |                   | 0.168   |                    | 0.728   |                   | 0.871   |                  | 0.908   |
| No                                                 | 0.85 (0.40-1.80) |         | 0.67 (0.37-1.187) |         | 1.50 (0.33-6.83)   |         | 1.05 (0.56-1.97)  |         | 1.03 (0.64-1.65) |         |
| Yes                                                | 1                |         | 1                 |         | 1                  |         | 1                 |         | 1                |         |
| Family history of<br>hypertension                  |                  | > 0.99  |                   | 0.074   |                    | > 0.99  |                   | 0.563   |                  | 0.129   |
| No                                                 | 1                |         | 1                 |         | 1                  |         | 1                 |         | 1                |         |
| Yes                                                | 0.98 (0.33-2.93) |         | 4.47 (0.65-30.79) |         | 1.15 (0.15-8.59)   |         | 1.49 (0.51-4.34)  |         | 2.26 (0.79-6.46) |         |
| Family history of<br>diabetes                      |                  | 0.566   |                   | 0.177   |                    | 0.457   |                   | 0.786   |                  | 0.167   |
| No                                                 | 1                |         | 1                 |         | 1                  |         | 1                 |         | 1                |         |
| Yes                                                | 0.80 (0.36-1.74) |         | 1.82 (0.76-4.32)  |         | 2.64 (0.34- 20.23) |         | 1.10 (0.56-2.17)  |         | 1.53 (0.84-2.80) |         |
| Family history of<br>depression                    |                  | 0.584   |                   | 0.227   |                    | 0.743   |                   | 0.911   |                  | 0.960   |
| No                                                 | 1                |         | 1                 |         | 1                  |         | 1                 |         | 1                |         |
| Yes                                                | 1.22 (0.60-2.45) |         | 1.41 (0.80-2.51)  |         | 1.41 (0.43-4.71)   |         | 1.03 (0.59-1.80)  |         | 0.99 (0.65-1.51) |         |
| Fall in the last 12 mo                             |                  | 0.798   |                   | 0.835   |                    | 0.703   |                   | 0.664   |                  | 0.079   |
| No                                                 | 1                |         | 1                 |         | 1                  |         | 1                 |         | 1                |         |
| Yes                                                | 1.11 (0.50-2.46) |         | 0.93 (0.48-1.79)  |         | 1.35 (0.35-5.13)   |         | 0.87 (0.45-1.66)  |         | 1.45 (0.96-2.26) |         |
| Fracture                                           |                  | 0.673   |                   | > 0.99  |                    | 0.715   |                   | 0.854   |                  | 0.163   |
| No                                                 | 1                |         | 1                 |         | 1                  |         | 1                 |         | 1                |         |
| Yes                                                | 0.83 (0.36-1.94) |         | 1 (0.53-1.88)     |         | 1.25 (0.32-4.77)   |         | 1.06 (0.58-1.92)  |         | 1.36 (0.88-2.11) |         |
| Difficulty of sleeping<br>or insomnia              |                  | 0.675   |                   | 0.927   |                    | 0.179   |                   | 0.144   |                  | 0.634   |
| No                                                 | 1                |         | 1                 |         | 1                  |         | 1                 |         | 1                |         |
| Yes                                                | 0.86 (0.41-1.77) |         | 1.03 (0.58-1.81)  |         | 2.57 (0.66-9.89)   |         | 1.51 (0.87-2.63)  |         | 1.11 (0.73-1.68) |         |
| Depression                                         |                  | 0.058   |                   | 0.024*  |                    | 0.747   |                   | 0.032*  |                  | 0.129   |
| No                                                 | 1                |         | 1                 |         | 1                  |         | 1                 |         | 1                |         |
| Yes                                                | 2.43 (0.97-6.10) |         | 2.40 (1.1-5.12)   |         | 1.35 (0.36-5.03)   |         | 2.17 (1.07-4.41)  |         | 1.45 (0.89-2.33) |         |
| Anxiety                                            |                  | 0.072   |                   | 0.058   |                    | 0.287   |                   | 0.019*  |                  | 0.398   |
| No                                                 | 1                |         | 1                 |         | 1                  |         | 1                 |         | 1                |         |
| Yes                                                | 2.88 (0.91-9.13) |         | 2.33 (0.97-5.60)  |         | 3.39 (0.44-26.07)  |         | 3.20 (1.21-8.48)  |         | 1.24 (0.75-2.07) |         |

**Supplementary Table 1.** Continued

| Independent variable                 | Neck              |                | Shoulder          |                | Elbow             |                | Wrist/hands       |                | Upper back       |                |
|--------------------------------------|-------------------|----------------|-------------------|----------------|-------------------|----------------|-------------------|----------------|------------------|----------------|
|                                      | PR (95% CI)       | <i>P</i> value | PR (95% CI)      | <i>P</i> value |
| Arthritis/arthrosis                  |                   | 0.065          |                   | 0.037*         |                   | 0.037*         |                   | 0.019*         |                  | 0.659          |
| No                                   | 1                 |                | 1                 |                | 1                 |                | 1                 |                | 1                |                |
| Yes                                  | 1.95 (0.96-3.97)  |                | 1.84 (1.04-3.27)  |                | 3.69 (1.13-12.00) |                | 1.92 (1.11-3.31)  |                | 1.11 (0.68-1.81) |                |
| Type 2 diabetes                      |                   | 0.117          |                   | 0.815          |                   | > 0.99         |                   | 0.068          |                  | 0.836          |
| No                                   | 1                 |                | 1                 |                | 1                 |                | 1                 |                | 1                |                |
| Yes                                  | 1.75 (0.87-3.53)  |                | 1.07 (0.60-1.91)  |                | 1 (0.29-3.41)     |                | 1.67 (0.96-2.88)  |                | 1.05 (0.68-1.59) |                |
| Edema in lower limbs                 |                   | 0.116          |                   | 0.225          |                   | -              |                   | 0.005*         |                  | 0.020*         |
| No                                   | 1                 |                | 1                 |                | -                 |                | 1                 |                | 1                |                |
| Yes                                  | 2.51 (0.79-7.91)  |                | 1.64 (0.74-3.63)  |                | -                 |                | 3.82 (1.24-11.74) |                | 2.29 (1.14-4.62) |                |
| Use of analgesics                    |                   | 0.499          |                   | 0.656          |                   | 0.750          |                   | 0.109          |                  | 0.254          |
| No                                   | 1                 |                | 1                 |                | 1                 |                | 1                 |                | 1                |                |
| Yes                                  | 1.27 (0.63-2.56)  |                | 1.14 (0.64-2.02)  |                | 1.27 (0.38-4.23)  |                | 1.57 (0.90-2.74)  |                | 1.27 (0.84-1.93) |                |
| Use of NSAIDs                        |                   | 0.632          |                   | 0.785          |                   | 0.243          |                   | 0.334          |                  | 0.707          |
| No                                   | 1                 |                | 1                 |                | 1                 |                | 1                 |                | 1                |                |
| Yes                                  | 1.21 (0.55-2.65)  |                | 1.10 (0.57-2.11)  |                | 2.19 (0.65-7.35)  |                | 1.34 (0.74-2.42)  |                | 1.10 (0.68-1.76) |                |
| Use of statin                        |                   | 0.072          |                   | 0.704          |                   | -              |                   | > 0.99         |                  | > 0.99         |
| No                                   | 1                 |                | 1                 |                | -                 |                | 1                 |                | 1                |                |
| Yes                                  | 2.55 (0.88-7.39)  |                | 1.27 (0.47-3.45)  |                | -                 |                | 0.78 (0.22-2.78)  |                | 1.08 (0.49-2.38) |                |
| Use of muscle relaxants              |                   | 0.444          |                   | 0.379          |                   | 0.113          |                   | 0.4066         |                  | 0.585          |
| No                                   | 1                 |                | 1                 |                | 1                 |                | 1                 |                | 1                |                |
| Yes                                  | 1.33 (0.64-2.74)  |                | 1.30 (0.72-2.35)  |                | 3.32 (0.72-15.18) |                | 1.27 (0.72-2.24)  |                | 0.89 (0.59-1.34) |                |
| Uric acid (mg/dL)                    |                   | > 0.99         |                   | 0.566          |                   | -              |                   | 0.782          |                  | 0.963          |
| Adequate                             | 1.11 (0.37-3.36)  |                | 1.60 (0.54-4.71)  |                | -                 |                | 1.23 (0.49-3.09)  |                | 1.02 (0.54-1.91) |                |
| Inadequate                           | 1                 |                | 1                 |                | -                 |                | 1                 |                | 1                |                |
| Vitamin D                            |                   | 0.655          |                   | 0.546          |                   | 0.751          |                   | 0.4618         |                  | 0.816          |
| Adequate                             | 1                 |                | 1                 |                | 1                 |                | 1                 |                | 1                |                |
| Inadequate                           | 0.84 (0.38-1.82)  |                | 0.82 (0.42-1.58)  |                | 0.76 (0.22-2.70)  |                | 1.27 (0.67-2.40)  |                | 1.06 (0.63-1.80) |                |
| C-reactive protein (mg/dL)           |                   | 0.894          |                   | 0.651          |                   | 0.284          |                   | 0.151          |                  | 0.333          |
| Non-reagent                          | 1.06 (0.48-2.33)  |                | 1.17 (0.59-2.27)  |                | 3.50 (0.45-26.97) |                | 1.72 (0.82-3.61)  |                | 1.29 (0.77-2.14) |                |
| Reagent                              | 1                 |                | 1                 |                | 1                 |                | 1                 |                | 1                |                |
| Hemoglobin (g/dL)                    |                   | > 0.99         |                   | 0.119          |                   | > 0.99         |                   | > 0.99         |                  | 0.836          |
| Adequate                             | 1.34 (0.35-5.15)  |                | 3.92 (0.57-26.76) |                | 1.01 (0.13-7.46)  |                | 0.95 (0.39-2.32)  |                | 0.93 (0.48-1.80) |                |
| Inadequate                           | 1                 |                | 1                 |                | 1                 |                | 1                 |                | 1                |                |
| Total cholesterol (mg/dL)            |                   | 0.692          |                   | 0.732          |                   | 0.184          |                   | 0.731          |                  | 0.763          |
| Adequate                             | 2.17 (0.32-14.77) |                | 1.48 (0.40-5.44)  |                | 0.35 (0.08-1.46)  |                | 1.57 (0.43-5.74)  |                | 0.89 (0.44-1.80) |                |
| Inadequate                           | 1                 |                | 1                 |                | 1                 |                | 1                 |                | 1                |                |
| HDL (mg/dL)                          |                   | > 0.99         |                   | 0.356          |                   | > 0.99         |                   | > 0.99         |                  | 0.131          |
| Adequate                             | 0.75 (0.19-2.88)  |                | 1.45 (0.66-3.17)  |                | 1 (0.13-7.41)     |                | 1.06 (0.43-2.58)  |                | 1.5 (0.88-2.54)  |                |
| Inadequate                           | 1                 |                | 1                 |                | 1                 |                | 1                 |                | 1                |                |
| LDL (mg/dL)                          |                   | > 0.99         |                   | > 0.99         |                   | -              |                   | -              |                  | 0.728          |
| Adequate                             | 1.57 (0.24-10.36) |                | 1.08 (0.30-3.80)  |                | -                 |                | -                 |                | 0.83 (0.39-1.79) |                |
| Inadequate                           | 1                 |                | 1                 |                | -                 |                | -                 |                | 1                |                |
| Body mass index (kg/m <sup>2</sup> ) |                   | 0.836          |                   | 0.258          |                   | > 0.99         |                   | 0.560          |                  | 0.438          |
| 35.0-39.9                            | 1                 |                | 1                 |                | 1                 |                | 1                 |                | 1                |                |
| 40.0-49.9                            | 0.89 (0.36-2.22)  |                | 0.63 (0.32-1.21)  |                | 1.78 (0.22-14.24) |                | 1.19 (0.55-2.59)  |                | 1.49 (0.75-2.94) |                |
| > 50                                 | 0.73 (0.25-2.16)  |                | 0.54 (0.24-1.22)  |                | 1.83 (0.20-16.76) |                | 0.81 (0.32-2.08)  |                | 1.22 (0.57-2.61) |                |
| Total fat %                          |                   | 0.798          |                   | 0.616          |                   | 0.460          |                   | 0.983          |                  | 0.013*         |
| 1 tercile                            | 0.95 (0.37-2.44)  |                | 1.18 (0.52-2.67)  |                | 0.95 (0.14-6.44)  |                | 1.04 (0.50-2.16)  |                | 1.03 (0.52-2.05) |                |
| 2 tercile                            | 1                 |                | 1                 |                | 1                 |                | 1                 |                | 1                |                |
| 3 tercile                            | 1.25 (0.519-3.01) |                | 1.46 (0.67-3.16)  |                | 2.43 (0.50-11.83) |                | 1.07 (0.52-2.21)  |                | 1.94 (1.11-3.41) |                |

Wald's test for all *P* values, except when frequencies were smaller than five in each case, Fisher's exact test was used. Economic class "Gross average family income in the month in R \$ per class": A-B = > 3,118, C = 896 to 3,117, D-E = ≤ 895.

PR: prevalence ratio, CI: confidence interval, NSAIDs: non-steroidal anti-inflammatory drugs, HDL: high-density lipoprotein, LDL: low-density lipoprotein.

\*Others include: student, rural worker, unemployed, leaning, pensioner, beneficiary of illness aid.

\*Significant association (*P* < 0.05).

**Supplementary Table 2.** Bivariate Analysis of the Association between Pain in Lower Body Regions and Independent Variables in Severely Obese Individuals (N = 150)

| Independent variable                            | Lower back        |         | Hip               |         | Knee             |         | Ankle/feet        |         |
|-------------------------------------------------|-------------------|---------|-------------------|---------|------------------|---------|-------------------|---------|
|                                                 | PR (95% CI)       | P value | PR (95% CI)       | P value | PR (95% CI)      | P value | PR (95% CI)       | P value |
| Sex                                             |                   | 0.334   |                   | 0.161   |                  | 0.147   |                   | 0.1442  |
| M                                               | 1                 |         | 1                 |         | 1                |         | 1                 |         |
| F                                               | 1.30 (0.76-2.21)  |         | 2.18 (0.73-6.46)  |         | 1.69 (0.83-3.44) |         | 1.43 (0.89-2.30)  |         |
| Age (yr)                                        |                   | 0.774   |                   | 0.031*  |                  | 0.642   |                   | 0.294   |
| ≤ 39                                            | 1                 |         | 1                 |         | 1                |         | 1                 |         |
| ≥ 40                                            | 0.95 (0.70-1.31)  |         | 1.80 (1.05- 3.06) |         | 1.09 (0.75-1.57) |         | 1.14 (0.89-1.47)  |         |
| Skin color                                      |                   | 0.373   |                   | 0.167   |                  | 0.4528  |                   | 0.860   |
| White                                           | 0.85 (0.58-1.22)  |         | 1.45 (0.86- 2.44) |         | 1.16 (0.79-1.69) |         | 1.02 (0.78-1.34)  |         |
| Brown and black                                 | 1                 |         | 1                 |         | 1                |         | 1                 |         |
| Living with partner                             |                   | 0.937   |                   | 0.453   |                  | 0.455   |                   | 0.972   |
| No                                              | 1                 |         | 1                 |         | 1                |         | 1                 |         |
| Yes                                             | 1.01 (0.73- 1.40) |         | 0.82 (0.48-1.38)  |         | 0.87 (0.60-1.26) |         | 1.00 (0.77-1.30)  |         |
| Years of schooling                              |                   | 0.871   |                   | 0.206   |                  | 0.869   |                   | 0.615   |
| ≤ 10                                            | 1.02 (0.75-1.40)  |         | 1.41 (0.83-2.41)  |         | 1.03 (0.71-1.49) |         | 1.07 (0.83-1.37)  |         |
| ≥ 11                                            | 1                 |         | 1                 |         | 1                |         | 1                 |         |
| Economic class                                  |                   | 0.272   |                   | 0.008*  |                  | 0.034*  |                   | 0.190   |
| A-B                                             | 1                 |         | 1                 |         | 1                |         | 1                 |         |
| C                                               | 1.27 (0.81-1.98)  |         | 1.77 (0.73-4.29)  |         | 1.48 (0.83-2.62) |         | 1.17 (0.82-1.67)  |         |
| D-E                                             | 1.52 (0.91-2.52)  |         | 3.4 (1.37- 8.41)  |         | 2.13 (1.16-3.90) |         | 1.42 (0.96-2.10)  |         |
| Occupation                                      |                   | 0.495   |                   | 0.404   |                  | 0.029*  |                   | 0.744   |
| Formal worker                                   | 1.21 (0.83-1.75)  |         | 1.32 (0.66-2.64)  |         | 1.10 (0.65-1.84) |         | 1.11 (0.81-1.52)  |         |
| Informal worker/freelance                       | 1                 |         | 1                 |         | 1                |         | 1                 |         |
| Retired/domestic worker and others <sup>a</sup> | 1.00 (0.66-1.50)  |         | 1.58 (0.81-3.06)  |         | 1.69 (1.08-2.63) |         | 1.12 (0.82-1.53)  |         |
| Smoking status                                  |                   | 0.309   |                   | 0.812   |                  | 0.787   |                   | 0.333   |
| No                                              | 1                 |         | 1                 |         | 1                |         | 1                 |         |
| Yes, former or current smoker                   | 1.18 (0.86-1.62)  |         | 1.07 (0.62-1.85)  |         | 1.05 (0.72-1.55) |         | 1.13 (0.88- 1.41) |         |
| Binge drinking                                  |                   | 0.477   |                   | 0.356   |                  | 0.893   |                   | 0.551   |
| No                                              | 1                 |         | 1                 |         | 1                |         | 1                 |         |
| Yes                                             | 1.13 (0.81-1.57)  |         | 1.29 (0.75-2.22)  |         | 1.03 (0.69-1.54) |         | 0.91 (0.68-1.23)  |         |
| Sedentary time (min/day)                        |                   | 0.279   |                   | 0.035*  |                  | 0.667   |                   | 0.778   |
| Lower                                           | 1.19 (0.87-1.62)  |         | 1.83 (1.04-3.21)  |         | 1.08 (0.75-1.57) |         | 0.96 (0.75-1.24)  |         |
| Higher                                          | 1                 |         | 1                 |         | 1                |         | 1                 |         |
| Daily fruits intake                             |                   | 0.372   |                   | 0.978   |                  | 0.403   |                   | 0.939   |
| No                                              | 1.19 (0.81-1.75)  |         | 0.99 (0.55-1.79)  |         | 1.21 (0.77-1.90) |         | 0.99 (0.75-1.31)  |         |
| Yes                                             | 1                 |         | 1                 |         | 1                |         | 1                 |         |
| Daily vegetables intake                         |                   | 0.260   |                   | 0.242   |                  | 0.779   |                   | 0.060   |
| No                                              | 0.83 (0.60-1.15)  |         | 0.73 (0.42-1.24)  |         | 1.06 (0.61-1.85) |         | 0.79 (0.62-1.01)  |         |
| Yes                                             | 1                 |         | 1                 |         | 1                |         | 1                 |         |
| Family history of hypertension                  |                   | 0.417   |                   | 0.781   |                  | 0.506   |                   | 0.129   |
| No                                              | 1                 |         | 1                 |         | 1                |         | 1                 |         |
| Yes                                             | 1.28 (0.71-2.31)  |         | 0.92 (0.42-2.03)  |         | 1.26 (0.64-2.46) |         | 1.57 (0.88-2.82)  |         |
| Family history of diabetes                      |                   | 0.584   |                   | 0.756   |                  | 0.777   |                   | 0.2567  |
| No                                              | 1                 |         | 1                 |         | 1                |         | 1                 |         |
| Yes                                             | 1.12 (0.75-1.66)  |         | 0.91 (0.49-1.66)  |         | 1.07 (0.68-1.68) |         | 1.22 (0.86-1.72)  |         |
| Family history of depression                    |                   | 0.162   |                   | 0.445   |                  | 0.474   |                   | 0.377   |
| No                                              | 1                 |         | 1                 |         | 1                |         | 1                 |         |
| Yes                                             | 1.24 (0.92-1.69)  |         | 1.23 (0.73-2.07)  |         | 1.14 (0.79-1.65) |         | 1.12 (0.87-1.44)  |         |
| Fall in the last 12 mo                          |                   | 0.407   |                   | 0.380   |                  | 0.216   |                   | 0.076   |
| No                                              | 1                 |         | 1                 |         | 1                |         | 1                 |         |
| Yes                                             | 1.15 (0.82-1.62)  |         | 1.29 (0.73-2.29)  |         | 1.28 (0.86-1.89) |         | 1.25 (0.97-1.61)  |         |
| Fracture                                        |                   | 0.229   |                   | 0.291   |                  | 0.397   |                   | 0.252   |
| No                                              | 1                 |         | 1                 |         | 1                |         | 1                 |         |
| Yes                                             | 1.22 (0.88-1.69)  |         | 1.35 (0.77-2.38)  |         | 1.19 (0.79-1.77) |         | 1.16 (0.89-1.51)  |         |
| Difficulty of sleeping or insomnia              |                   | 0.163   |                   | 0.011*  |                  | 0.003*  |                   | 0.232   |
| No                                              | 1                 |         | 1                 |         | 1                |         | 1                 |         |
| Yes                                             | 1.25 (0.91-1.71)  |         | 2.05 (1.18-3.56)  |         | 1.80 (1.22-2.65) |         | 1.17 (0.90-1.51)  |         |
| Depression                                      |                   | 0.289   |                   | 0.070   |                  | 0.061   |                   | 0.049*  |
| No                                              | 1                 |         | 1                 |         | 1                |         | 1                 |         |
| Yes                                             | 1.20 (0.85-1.69)  |         | 1.79 (0.95-3.38)  |         | 1.51 (0.98-2.33) |         | 1.34 (1.00-1.80)  |         |
| Anxiety                                         |                   | 0.290   |                   | 0.024*  |                  | 0.104   |                   | 0.129   |
| No                                              | 1                 |         | 1                 |         | 1                |         | 1                 |         |
| Yes                                             | 1.23 (0.84-1.82)  |         | 2.71 (1.14-6.44)  |         | 1.50 (0.92-2.46) |         | 1.29 (0.93-1.79)  |         |

**Supplementary Table 2.** Continued

| Independent variable                 | Lower back       |         | Hip               |         | Knee             |         | Ankle/feet       |         |
|--------------------------------------|------------------|---------|-------------------|---------|------------------|---------|------------------|---------|
|                                      | PR (95% CI)      | P value | PR (95% CI)       | P value | PR (95% CI)      | P value | PR (95% CI)      | P value |
| Arthritis/arthrosis                  |                  | 0.517   |                   | 0.003*  |                  | 0.006*  |                  | 0.154   |
| No                                   | 1                |         | 1                 |         | 1                |         | 1                |         |
| Yes                                  | 1.12 (0.79-1.61) |         | 2.13 (1.29-3.52)  |         | 1.64 (1.15-2.34) |         | 1.21 (0.93-1.58) |         |
| Type 2 diabetes                      |                  | 0.554   |                   | 0.331   |                  | 0.324   |                  | 0.184   |
| No                                   | 1                |         | 1                 |         | 1                |         | 1                |         |
| Yes                                  | 0.91 (0.65-1.25) |         | 1.29 (0.77-2.18)  |         | 0.82 (0.56-1.21) |         | 1.18 (0.92-1.51) |         |
| Edema in lower limbs                 |                  | 0.023*  |                   | 0.106   |                  | 0.020*  |                  | 0.003*  |
| No                                   | 1                |         | 1                 |         | 1                |         | 1                |         |
| Yes                                  | 1.77 (1.08-2.90) |         | 1.91 (0.87-4.19)  |         | 2.04 (1.12-3.71) |         | 2.02 (1.28-3.18) |         |
| Use of analgesics                    |                  | 0.773   |                   | 0.277   |                  | 0.145   |                  | 0.294   |
| No                                   | 1                |         | 1                 |         | 1                |         | 1                |         |
| Yes                                  | 0.95 (0.69-1.31) |         | 1.34 (0.79-2.25)  |         | 1.31 (0.91-1.89) |         | 1.14 (0.89-1.47) |         |
| Use of NSAIDs                        |                  | 0.415   |                   | 0.281   |                  | 0.249   |                  | 0.056   |
| No                                   | 1                |         | 1                 |         | 1                |         | 1                |         |
| Yes                                  | 1.15 (0.81-1.62) |         | 1.36 (0.78-2.38)  |         | 1.26 (0.85-1.86) |         | 1.28 (0.99-1.64) |         |
| Use of statin                        |                  | 0.329   |                   | > 0.99  |                  | 0.747   |                  | 0.319   |
| No                                   | 1                |         | 1                 |         | 1                |         | 1                |         |
| Yes                                  | 1.40 (0.90-2.17) |         | 1.11 (0.41-2.97)  |         | 1.17 (0.61-2.24) |         | 1.32 (0.94-1.85) |         |
| Use of muscle relaxant               |                  | 0.347   |                   | 0.376   |                  | 0.860   |                  | 0.091   |
| No                                   | 1                |         | 1                 |         | 1                |         | 1                |         |
| Yes                                  | 1.17 (0.85-1.61) |         | 0.79 (0.47-1.33)  |         | 0.97 (0.67-1.39) |         | 1.26 (0.96-1.63) |         |
| Uric acid (mg/dL)                    |                  | 0.428   |                   | 0.650   |                  | 0.909   |                  | 0.707   |
| Adequate                             | 1.25 (0.72-2.17) |         | 0.85 (0.41-1.74)  |         | 1.03 (0.59-1.82) |         | 1.08 (0.72-1.62) |         |
| Inadequate                           | 1                |         | 1                 |         | 1                |         | 1                |         |
| Vitamin D                            |                  | 0.658   |                   | 0.786   |                  | 0.934   |                  | 0.901   |
| Adequate                             | 1                |         | 1                 |         | 1                |         | 1                |         |
| Inadequate                           | 0.90 (0.58-1.42) |         | 1.09 (0.59-2.01)  |         | 0.98 (0.60-1.59) |         | 1.03 (0.68-1.54) |         |
| C-reactive protein (mg/dL)           |                  | 0.125   |                   | 0.846   |                  | 0.501   |                  | 0.703   |
| Non-reagent                          | 1.37 (0.91-2.06) |         | 1.06 (0.58-1.92)  |         | 0.88 (0.59-1.29) |         | 1.06 (0.79-1.41) |         |
| Reagent                              | 1                |         | 1                 |         | 1                |         | 1                |         |
| Hemoglobin (g/dL)                    |                  | 0.696   |                   | > 0.99  |                  | 0.798   |                  | 0.280   |
| Adequate                             | 1.12 (0.64-1.97) |         | 1.04 (0.43-2.51)  |         | 0.93 (0.52-1.65) |         | 1.36 (0.78-2.37) |         |
| Inadequate                           | 1                |         | 1                 |         | 1                |         | 1                |         |
| Total cholesterol (mg/dL)            |                  | 0.025*  |                   | 0.513   |                  | 0.502   |                  | 0.537   |
| Adequate                             | 0.66 (0.45-0.95) |         | 1.69 (0.46-6.20)  |         | 1.33 (0.58-3.02) |         | 0.81 (0.57-1.16) |         |
| Inadequate                           | 1                |         | 1                 |         | 1                |         | 1                |         |
| HDL (mg/dL)                          |                  | 0.868   |                   | > 0.99  |                  | 0.374   |                  | 0.679   |
| Adequate                             | 1.04 (0.63-1.72) |         | 0.97 (0.40-2.36)  |         | 1.26 (0.75-2.11) |         | 1.02 (0.74-1.59) |         |
| Inadequate                           | 1                |         | 1                 |         | 1                |         | 1                |         |
| LDL (mg/dL)                          |                  | 0.168   |                   | 0.445   |                  | 0.732   |                  | 0.537   |
| Adequate                             | 0.64 (0.43-0.95) |         | 2.61 (0.40-16.97) |         | 1.35 (0.52-3.47) |         | 0.92 (0.57-1.50) |         |
| Inadequate                           | 1                |         | 1                 |         | 1                |         | 1                |         |
| Body mass index (kg/m <sup>2</sup> ) |                  | 0.048*  |                   | 0.639   |                  | 0.873   |                  | 0.038*  |
| 35.0-39.9                            | 1                |         | 1                 |         | 1                |         | 1                |         |
| 40.0-49.9                            | 1.69 (0.97-2.93) |         | 0.89 (0.46-1.74)  |         | 1.07 (0.62-1.84) |         | 1.62 (1.02-2.58) |         |
| > 50                                 | 1.15 (0.61-2.18) |         | 0.68 (0.30-1.55)  |         | 1.16 (0.65-2.08) |         | 1.22 (0.72-2.07) |         |
| Total fat %                          |                  | 0.143   |                   | 0.195   |                  | 0.459   |                  | 0.093   |
| 1 tercile                            | 1.24 (0.78-1.98) |         | 1.18 (0.52-2.67)  |         | 1.02 (0.57-1.79) |         | 1.14 (0.78-1.66) |         |
| 2 tercile                            | 1                |         | 1                 |         | 1                |         | 1                |         |
| 3 tercile                            | 1.52 (0.99-2.34) |         | 1.82 (0.88-3.78)  |         | 1.32 (0.79-2.22) |         | 1.41 (1.00-1.98) |         |

Wald's test for all P values, except when frequencies were smaller than five in each case, Fisher's exact test was used. Economic class "Gross average family income in the month in R \$ per class": A-B = > 3,118, C = 896 to 3,117, D-E = ≤ 895.

PR: prevalence ratio, CI: confidence interval, NSAIDs: non-steroidal anti-inflammatory drugs, HDL: high-density lipoprotein, LDL: low-density lipoprotein.

<sup>a</sup>Others include: student, rural worker, unemployed, learning, pensioner, beneficiary of illness aid.

\*Significant association ( $P < 0.05$ ).
